# Supplementary material
Source: PubMed Central journal article supplement (PMC5707205)

# Supplemental Figure 1

A

## Read Counts Versus Total Reads for a Typical Amplicon

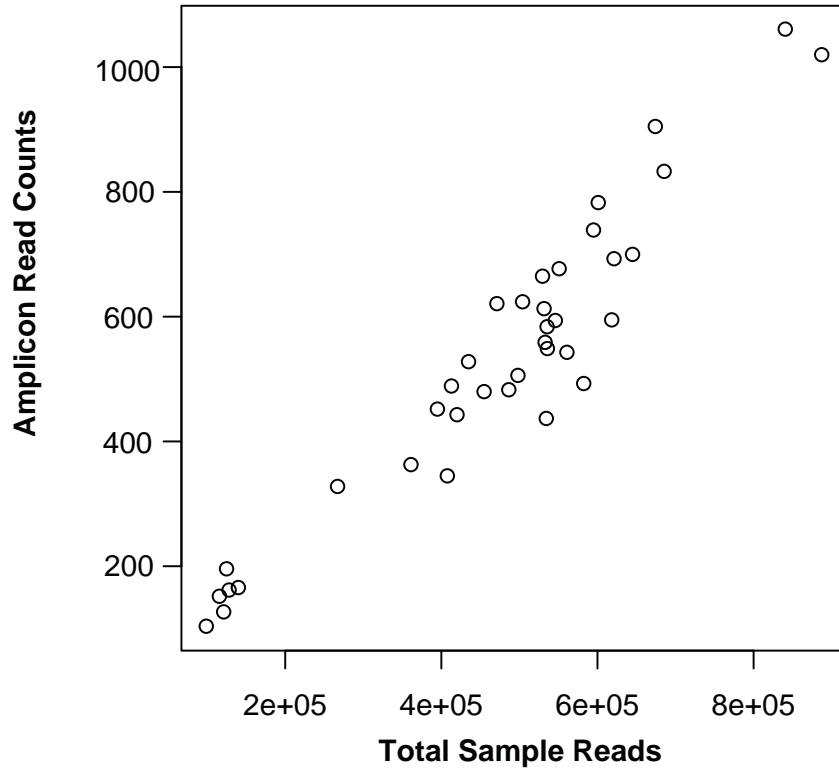

B

## Read Counts Normalized by Total Reads for a Typical Amplicon

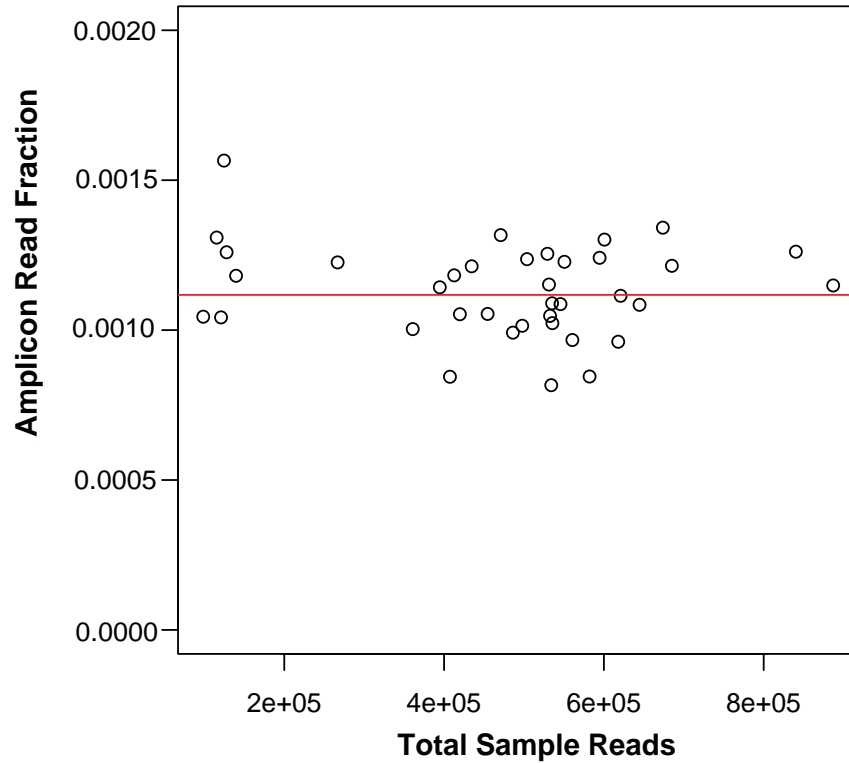

Supplement: mmc1.pdf [file mmc1.pdf]
