# Supplementary material
Source: PubMed Central journal article supplement (PMC5707205)

# Supplemental Figure 2

## A

Normalization of Read Counts by Total Reads in the Sample and Matched Normal Read Counts

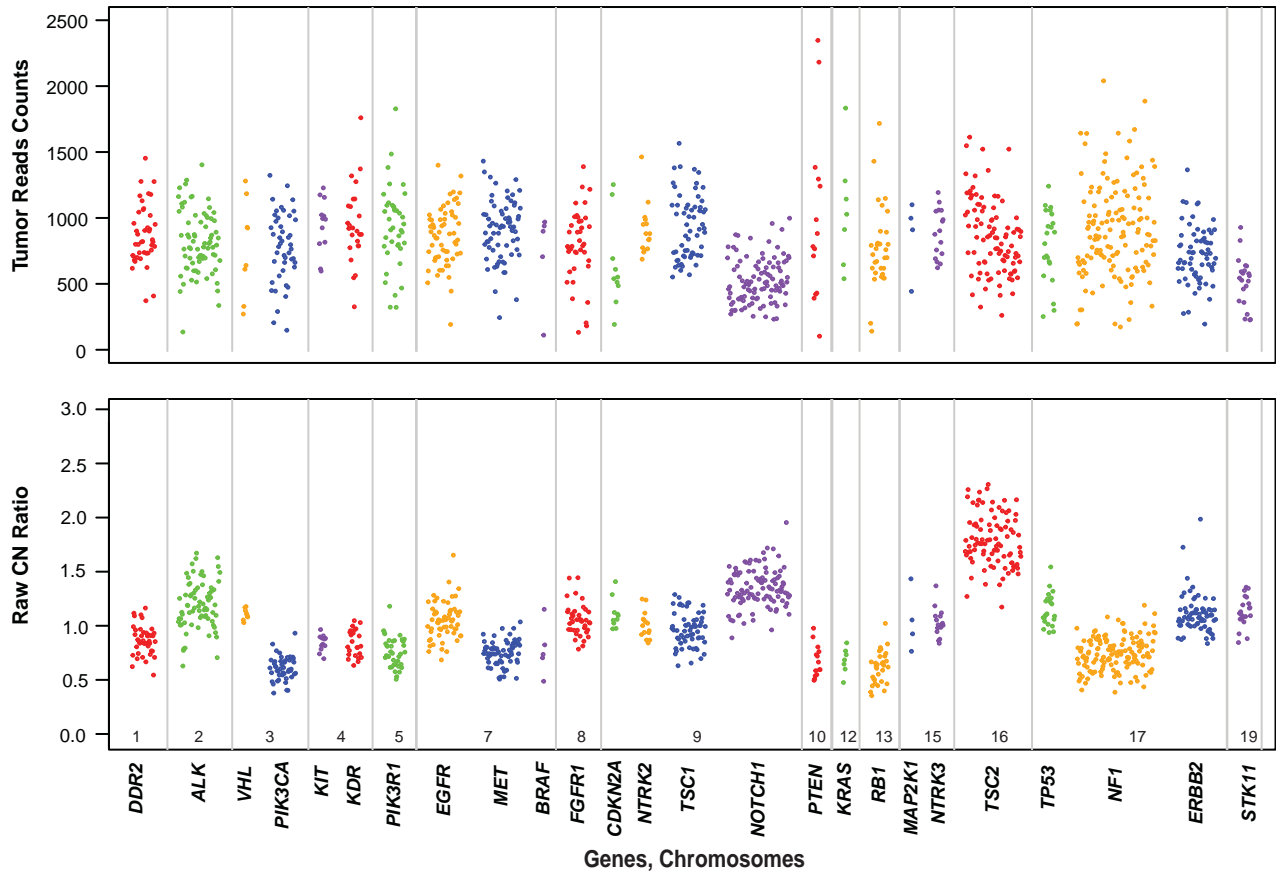

## B

GC-Content Correction of Log<sub>2</sub>(Copy Number Ratios)

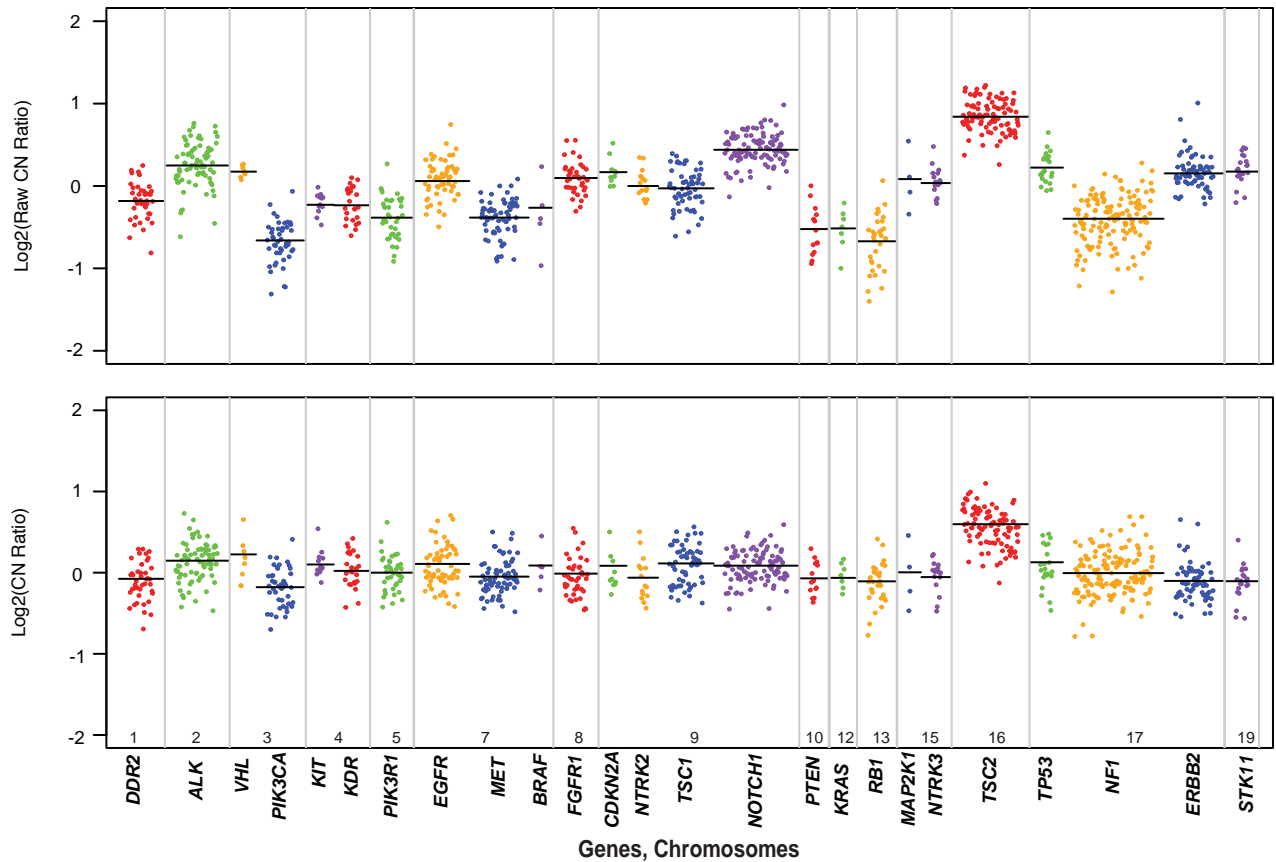

Supplement: mmc2.pdf [file mmc2.pdf]
