# Supplementary material
Source: PubMed Central journal article supplement (PMC5707205)

# Supplemental Figure 4

A

## Sample Replicate Pair Correlation

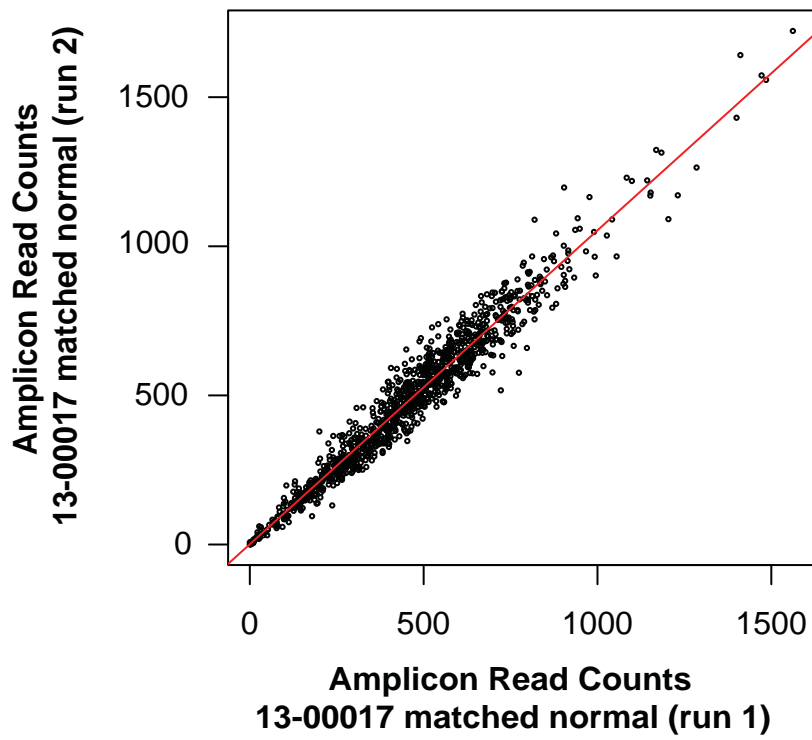

B

## Correlation of Technical Replicate Pairs

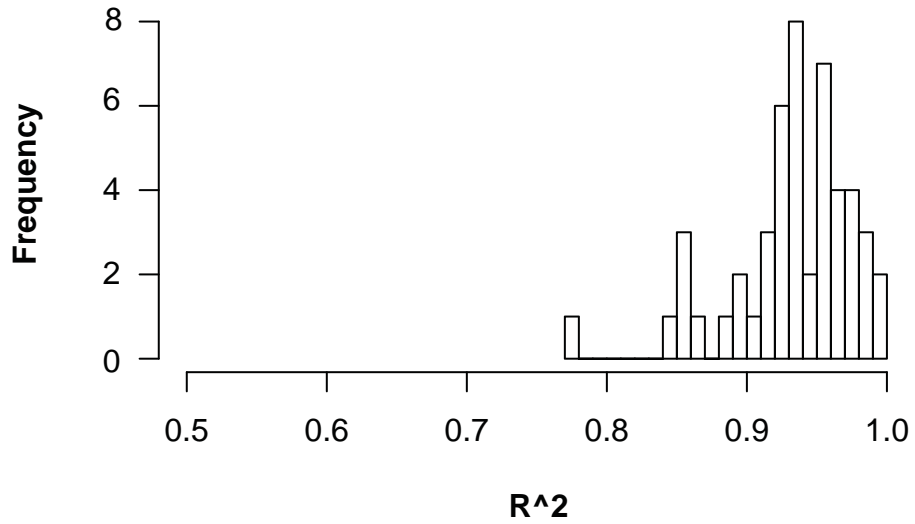

Supplement: mmc4.pdf [file mmc4.pdf]
