# Supplementary material
Source: PubMed Central journal article supplement (PMC5707205)

# Supplemental Figure 5

## A Sample Normal Pair Correlation

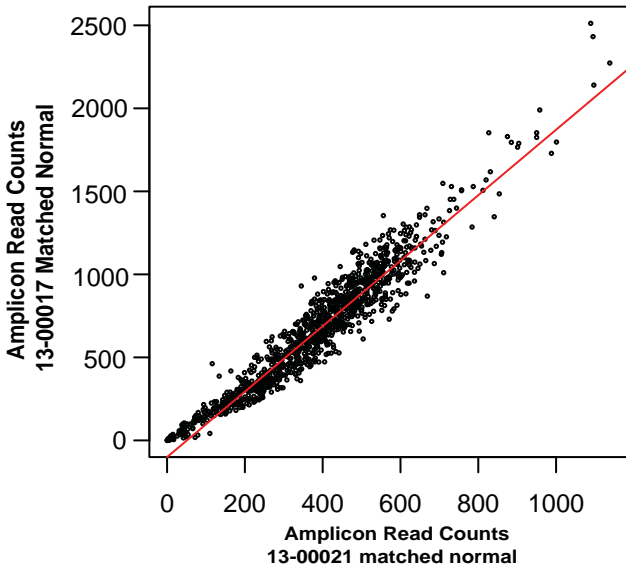

## B Correlation of All Normal Pairs

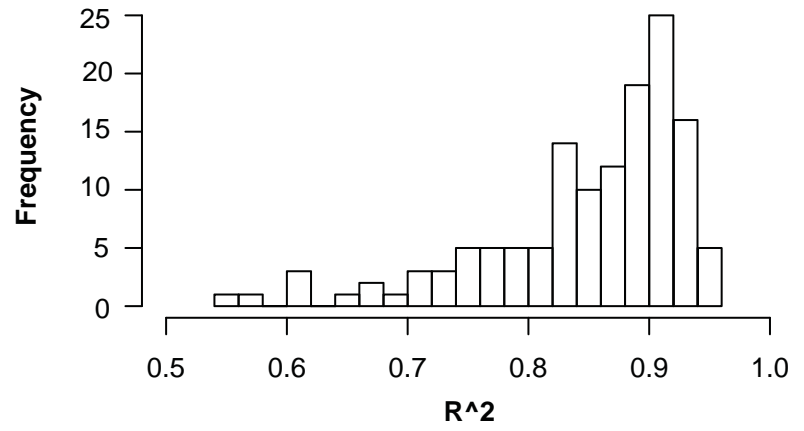

## C Three Standard Deviation Significance Cut-Off for Each Gene Based on Normals

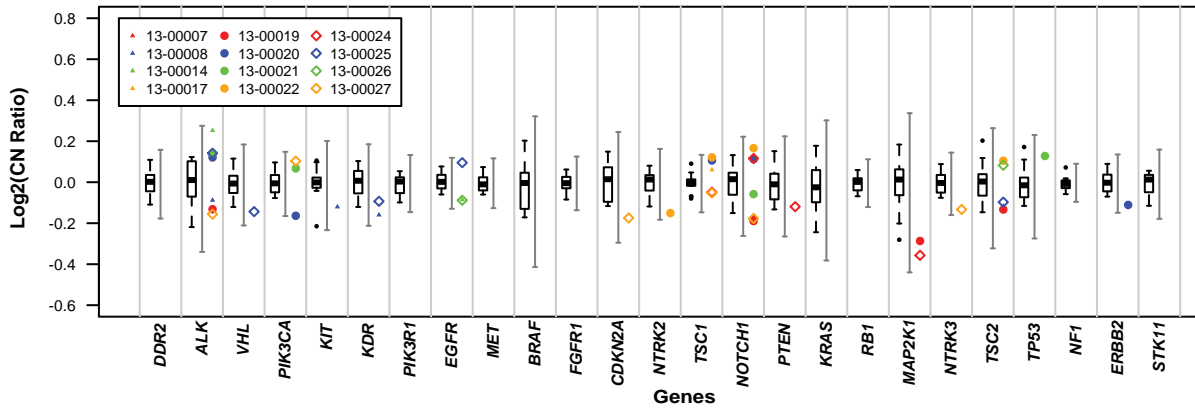

## D Fold Changes for Genes With Discrepant Calls in Matched Normal Versus Normal Pool

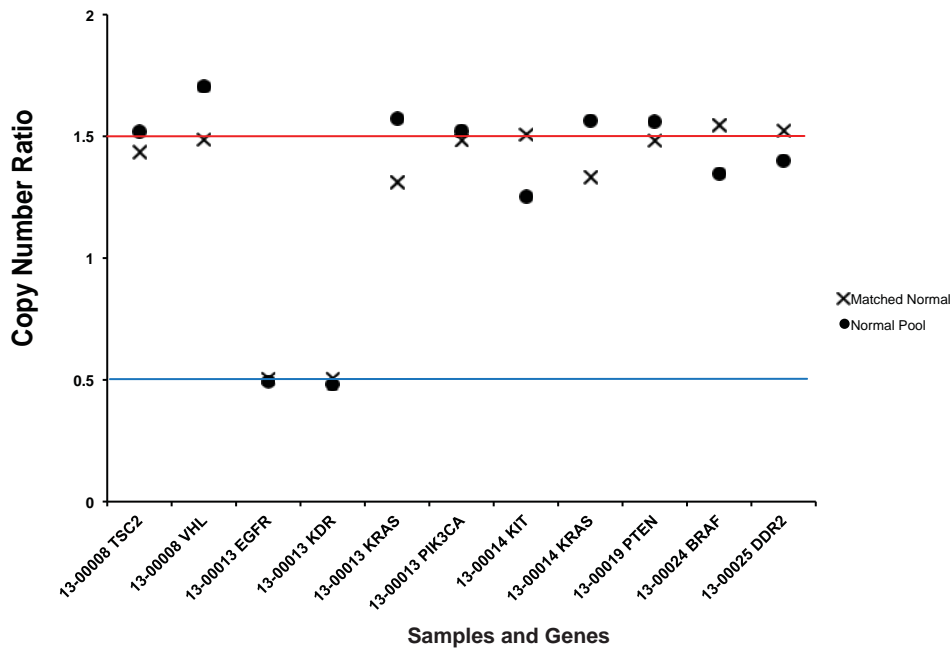

Supplement: mmc5.pdf [file mmc5.pdf]
