# Supplementary material
Source: PubMed Central journal article supplement (PMC5707205)

# Supplemental Figure 6

Distribution of Fold Change Estimates For All Matched Normals For Genes with Varying Numbers of Amplicons

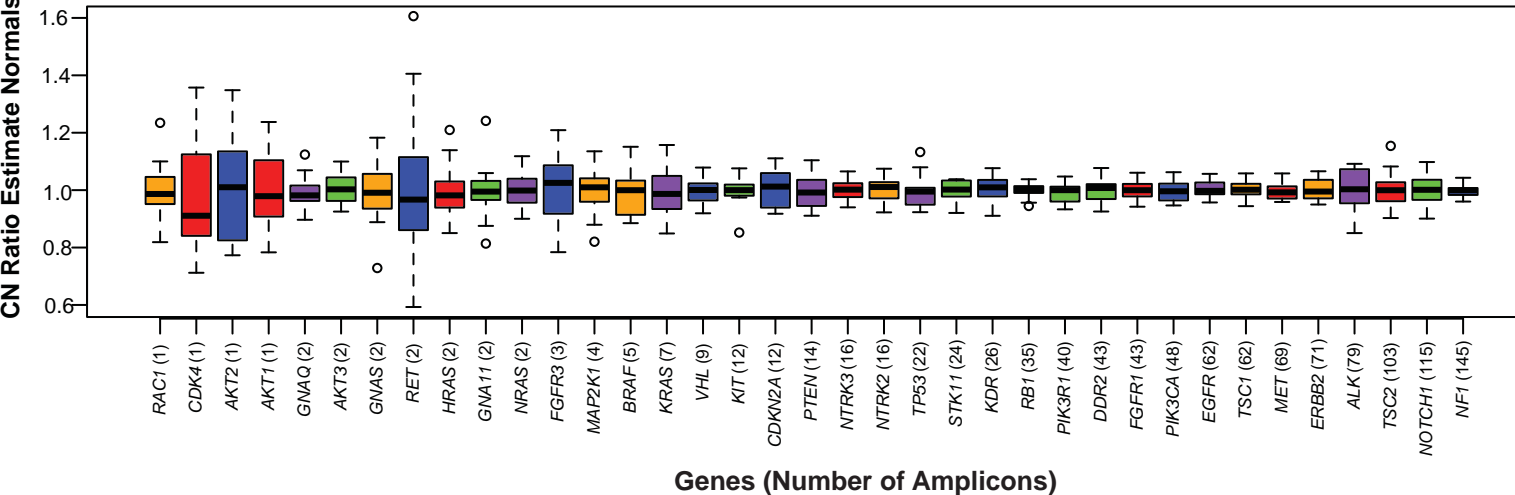

Supplement: mmc6.pdf [file mmc6.pdf]
