# Supplementary material
Source: PubMed Central journal article supplement (PMC5707205)

# Supplemental Figure 8

A

## Sensitivity to Detect an *ERBB2* Gain at Varying Levels of Tumor Purity

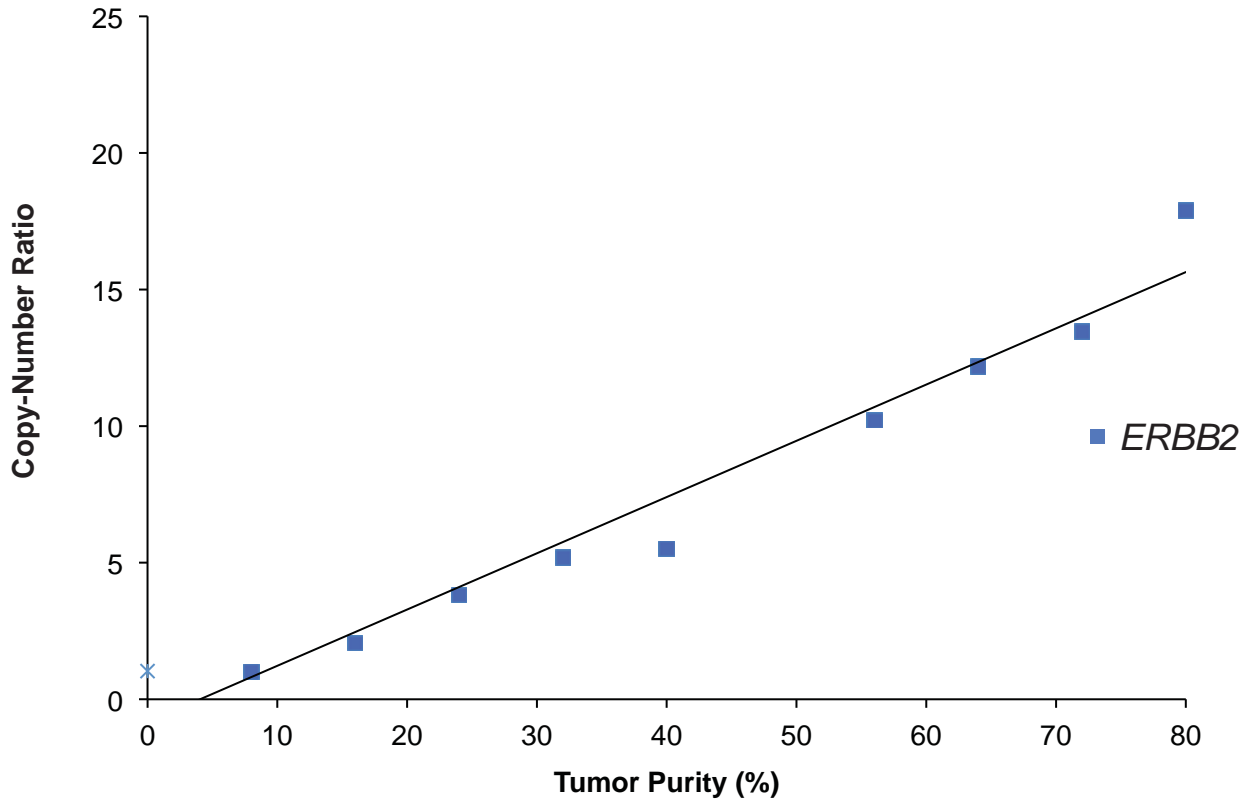

B

## Sensitivity to Detect a *DDR2* Gain and an *RB1* Loss at Varying Levels of Tumor Purity

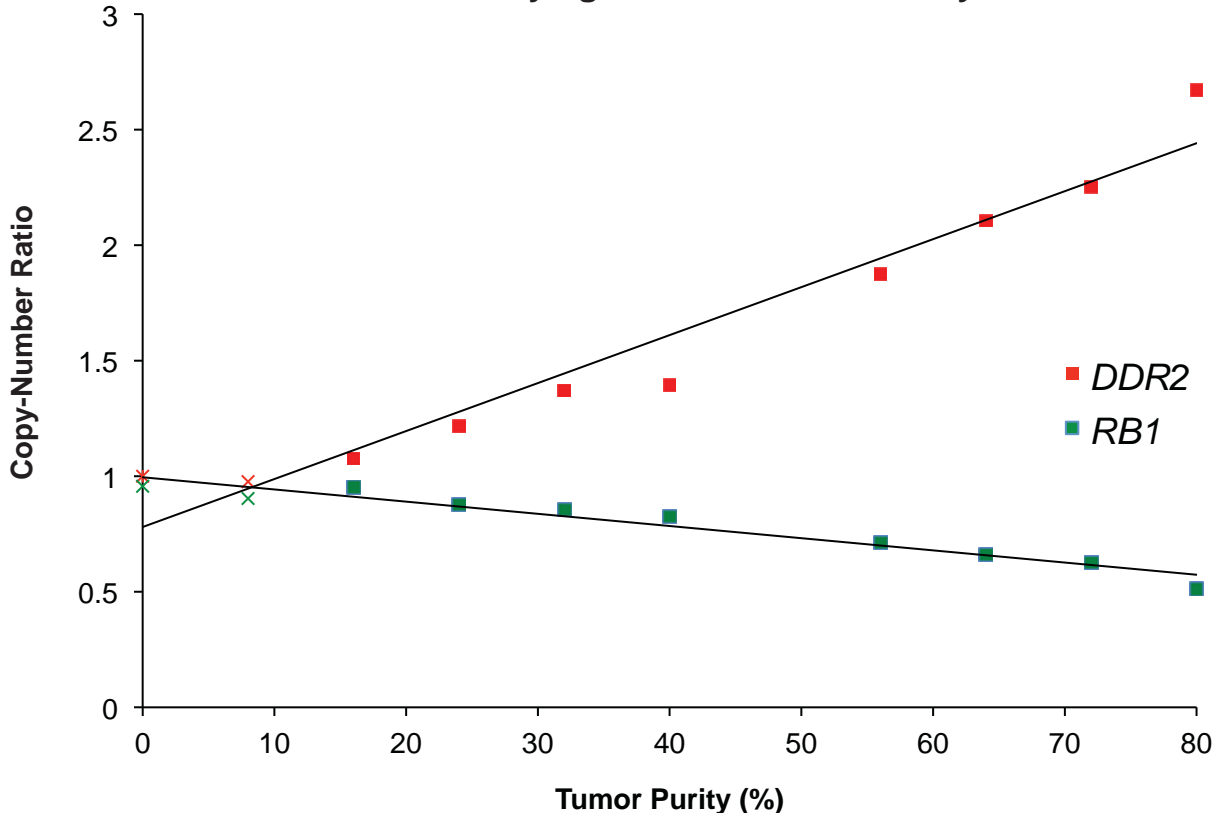

Supplement: mmc8.pdf [file mmc8.pdf]
