# Supplementary material
Source: PubMed Central journal article supplement (PMC5707205)

# Supplemental Figure 9

## A

### *ERBB2* Fold Change Estimate For Increasing Number of Amplicons and Tumor Purity

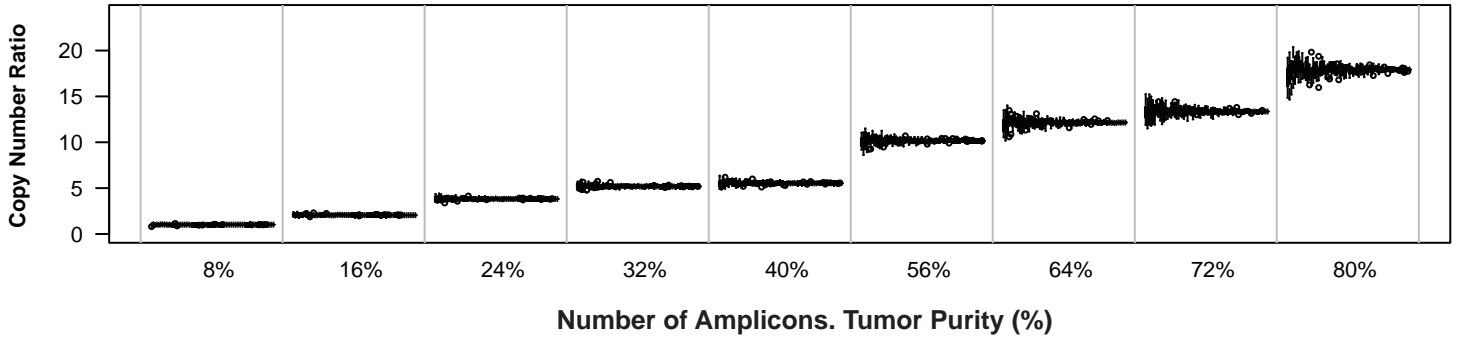

## B

### *ERBB2* Significance For Increasing Number of Amplicons and Tumor Purity

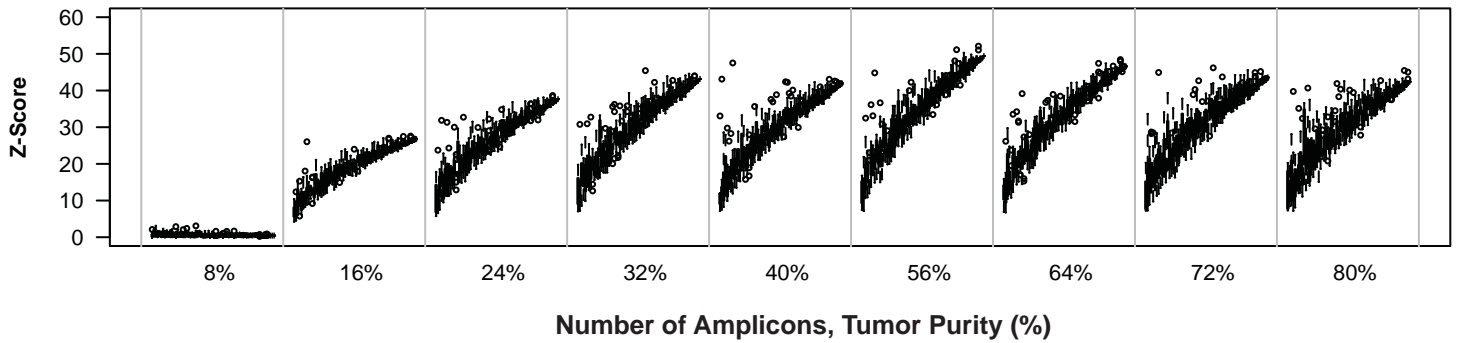

## C

### *RB1* Fold Change Estimate for Increasing Number of Amplicons and Tumor Purity

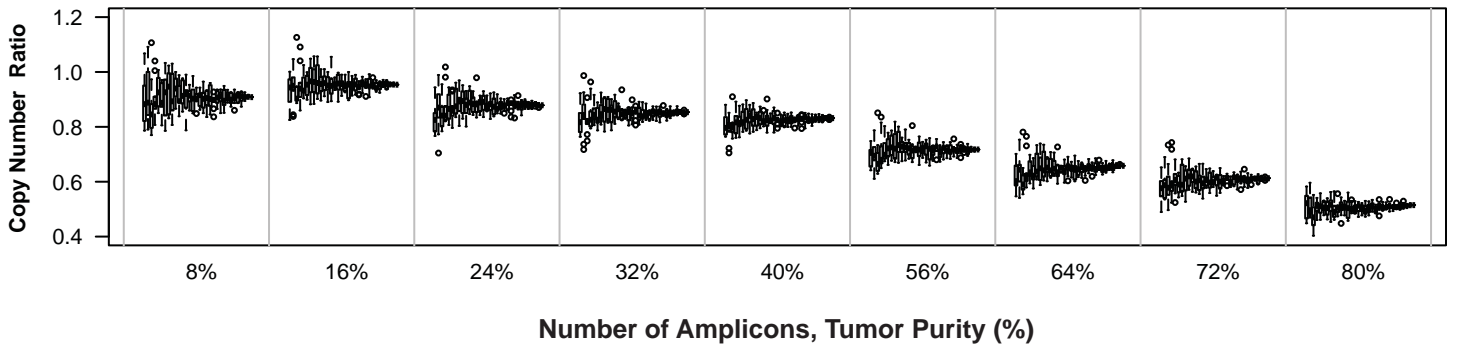

## D

### *RB1* Significance for Increasing Number of Amplicons and Tumor Purity

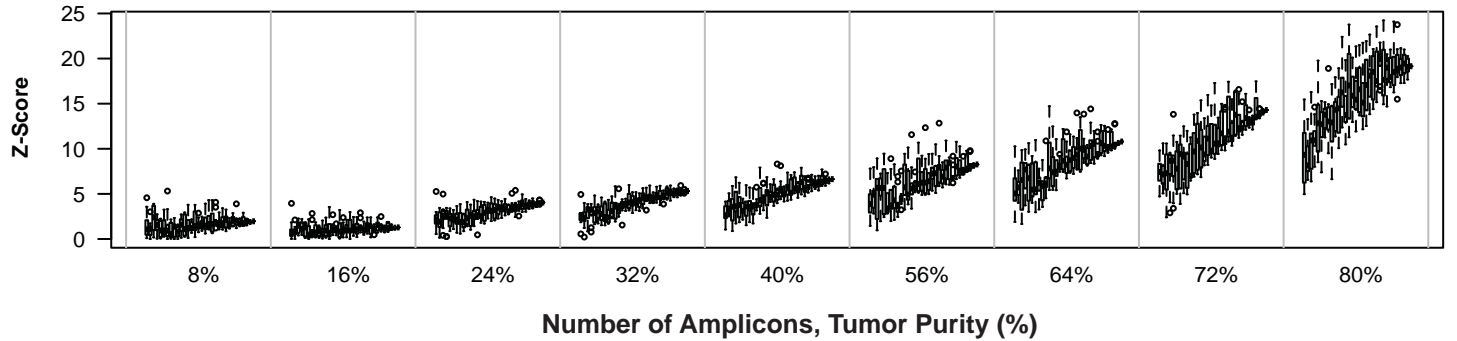

Supplement: mmc9.pdf [file mmc9.pdf]
