# Supplementary material
Source: PubMed Central journal article supplement (PMC5707205)

# Supplemental Figure 3

## A

### Probe Variance in Matched Normals

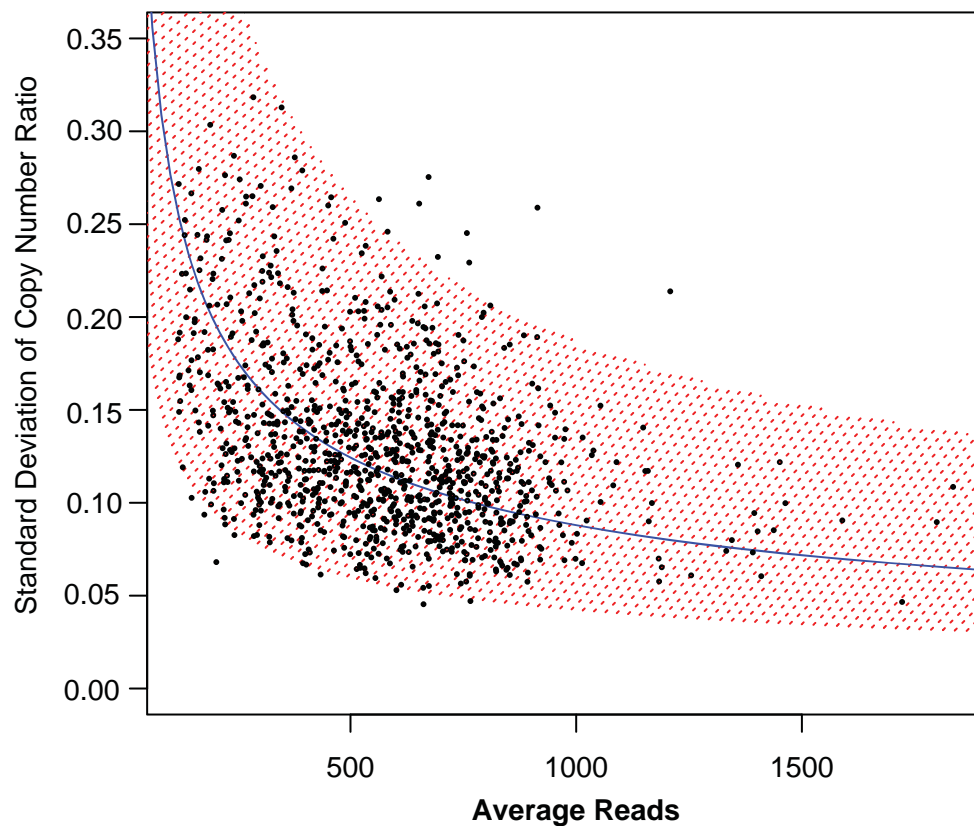

## B

### Probe Variance in Matched Tumors

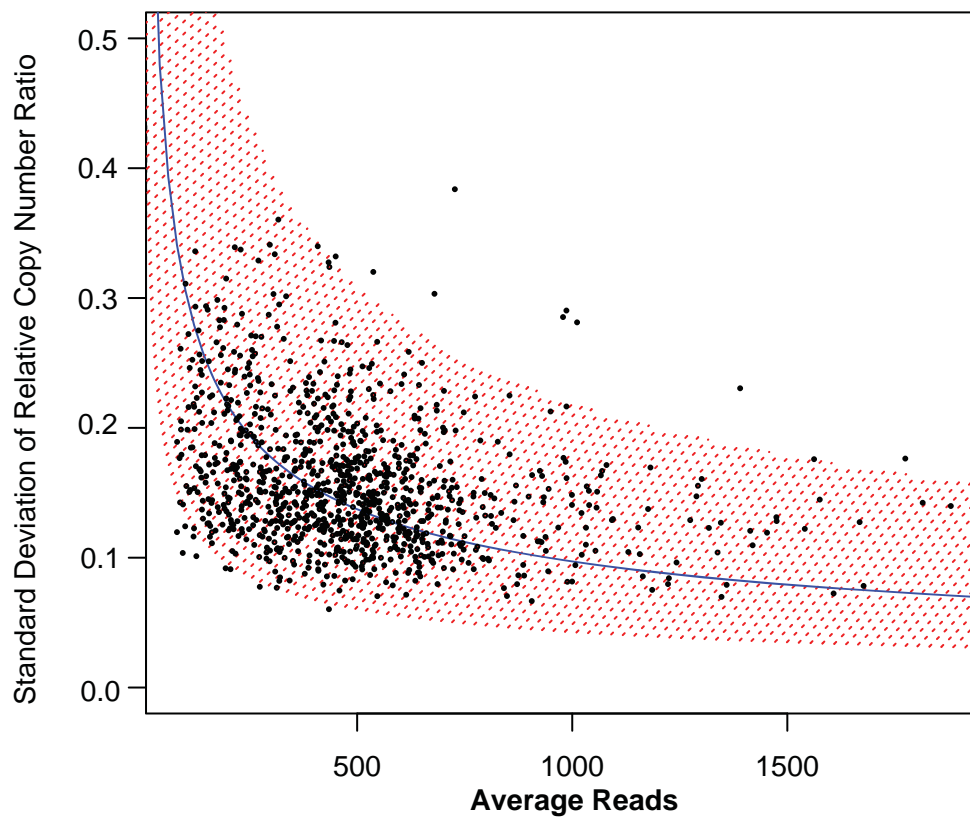

Supplement: mmc3.pdf [file mmc3.pdf]

# Supplemental Figure 7

A

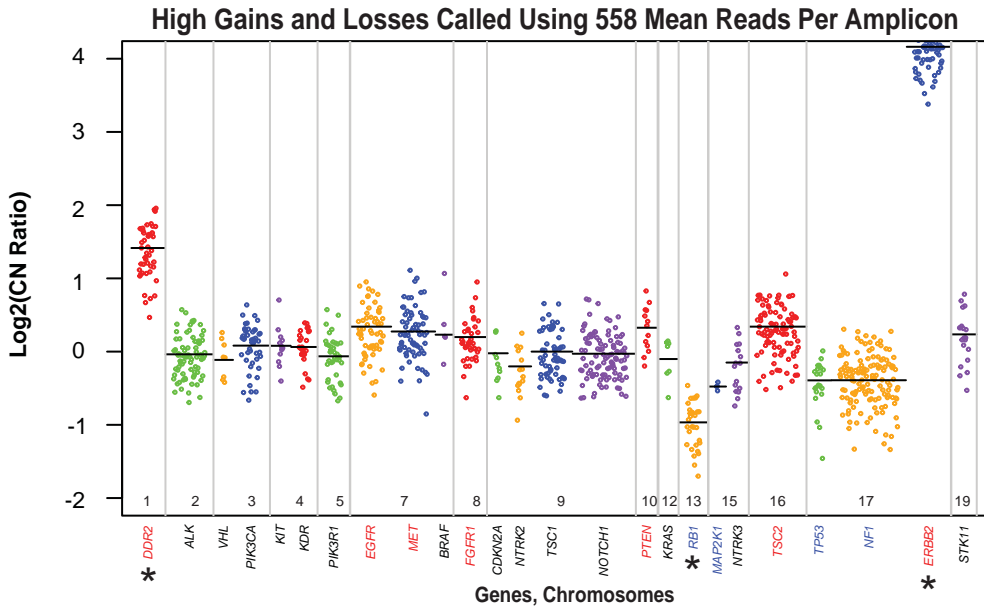

B

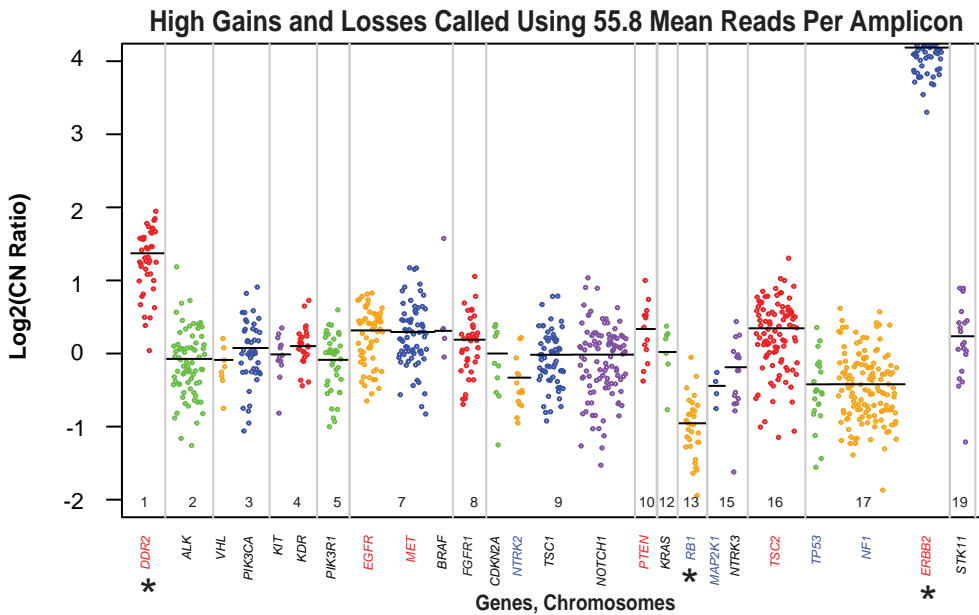

C

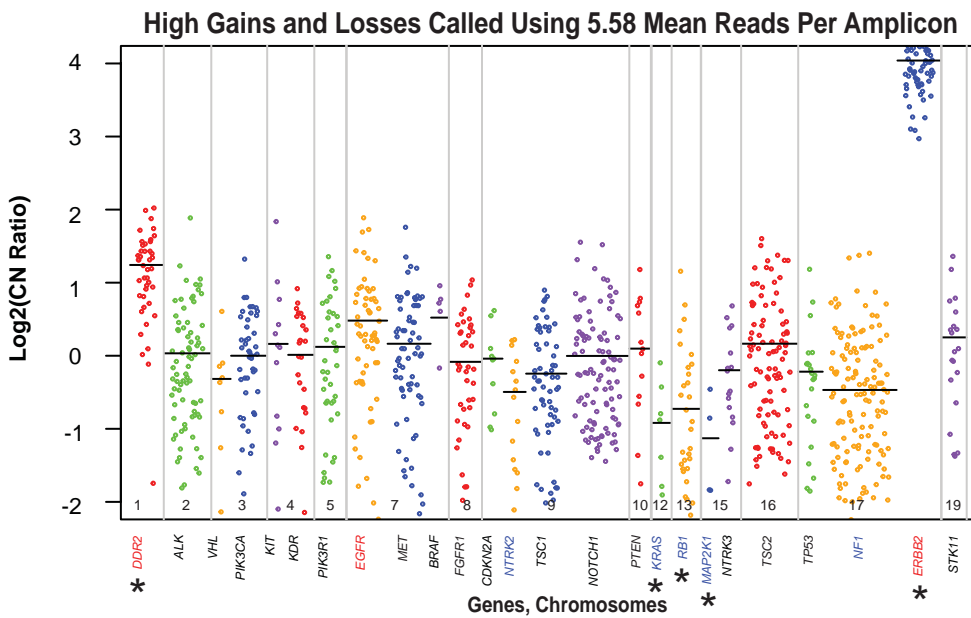

Supplement: mmc7.pdf [file mmc7.pdf]
